# Supplementary material for: Exploration of post-insertion challenges edentulous patients present to dental practitioners during removable complete denture rehabilitation in Makerere University Dental Hospital in Uganda
Source: Research Square preprint supplement (doi:10.21203/rs.3.rs-7109863/v1), 2025-08-21
Supplement: Supplementary file 1 [file 7d5ab65c34a0ec0da13650cc.docx]

**INTERVIEW GUIDE FOR DENTAL CLINICIANS AND DENTAL TECHNOLOGISTS**

**Experience in treating edentulous patients**

1. Tell me about your experience with managing edentulous patients (please describe the process of assessing edentulous patients for complete denture therapy. What factors do you consider when determining that complete denture treatment is suitable for the patient?).
2. What are patients’ expectations when they come for treatment?
3. How do you work towards meeting those expectations?
4. What are their fears/concerns do they have regarding complete denture treatment?
5. How do you communicate with patients throughout the complete denture fabrication process, from the initial consultation to final fitting?
6. What information do you share with them during the informed consent process? (probe: benefits, limitations, risks or discomforts or potential outcomes of complete denture therapy)
7. How do you encourage them to take up the treatment?
8. Can you share some common challenges that edentulous patients may face during the adaption period with complete dentures?
9. How do you address patients concern such as speech difficulties, sore spots or psychological adjustment during the initial stages of wearing complete dentures?
10. What challenges do patients face while wearing complete dentures? Probe: what causes those challenges? How do you help them to adapt to the denture?
11. What challenges do you face when treating edentulous patients? (Probe: patient non-compliance, language barrier, medical terminologies).
12. Can you discuss the significance of educating complete denture wearers about proper care and maintenance of their dentures? How does this education impact the long term success of denture therapy?
13. What post-insertion advice do you give patients? (what guidance do you give to patients about proper denture care and maintenance to ensure long term success? What strategies do you use to effectively convey information and ensure patients understanding?)
14. What guidance do you give patients to clean and maintain their dentures?
